# Supplementary material for: Prognostic and clinicopathological role of high Ki-67 expression in patients with renal cell carcinoma: a systematic review and meta-analysis
Source: PubMed Central journal article supplement (PMC5347162; doi:10.1038/srep44281), 2017-03-13
Supplement: srep44281-s1.pdf [file srep44281-s1.pdf]

# **Prognostic and clinicopathological role of high Ki-67 expression in patients with renal cell carcinoma: a systematic review and meta-analysis**

Yongpeng Xie<sup>1,2&</sup>, Luyao Chen<sup>1&</sup>, Xin Ma<sup>1</sup>, Hongzhao Li<sup>1</sup>, Liangyou Gu<sup>1</sup>, Yu Gao<sup>1</sup>, Yang Fan<sup>1</sup>, Yu Zhang<sup>1</sup>, Xu Zhang<sup>1\*</sup>

& These authors equally dedicated to this article.

<sup>1</sup> State Key Laboratory of Kidney Diseases, Department of Urology, Chinese PLA Medical School, Chinese PLA General Hospital, Beijing, People's Republic of China

<sup>2</sup> Medical School, Nankai University, Tianjin, People's Republic of China

\* Corresponding author: Xu Zhang, M.D.

Department of Urology, Chinese PLA General Hospital, Beijing 100853, P.R. China.

Tel: +86-10-66938008; Fax: +86-10-68223575

E-mail: xzhang@tjh.tjmu.edu.cn

**Supplemental table 1. Pooled HR (95% CI) of sensitivity analysis for the effect of Ki-67 expression on OS**

| <b>Study Omitted</b>      | <b>Pooled HR</b> | <b>95% CI</b> | <b>P Value</b> | <b>Model</b> | <b>Heterogeneity <math>I^2</math> (%)</b> | <b>P Value</b> |
|---------------------------|------------------|---------------|----------------|--------------|-------------------------------------------|----------------|
| Pinto (2005)              | 1.84             | 1.35-2.51     | <0.001         | fixed        | 0                                         | 0.895          |
| Kankuri (2006)            | 2.01             | 1.46-2.77     | <0.001         | fixed        | 0                                         | 0.510          |
| Gontero (2008)            | 1.96             | 1.43-2.70     | <0.001         | fixed        | 0                                         | 0.432          |
| Kankuri-Tammilehto (2010) | 2.06             | 1.44-2.94     | <0.001         | fixed        | 0                                         | 0.479          |
| Virman (2016)             | 1.86             | 1.22-2.82     | 0.004          | fixed        | 0                                         | 0.443          |
| Combined                  | 1.95             | 1.44-2.64     | <0.001         | fixed        | 0                                         | 0.594          |

HR: hazard ratio; CI: confidence interval; OS: overall survival.

**Supplemental table 2. Pooled HR (95% CI) of sensitivity analysis for the effect of Ki-67 expression on CSS**

| <b>Study Omitted</b>  | <b>Pooled HR</b> | <b>95% CI</b> | <b>P Value</b> | <b>Model</b> | <b>Heterogeneity <math>I^2</math> (%)</b> | <b>P Value</b> |
|-----------------------|------------------|---------------|----------------|--------------|-------------------------------------------|----------------|
| Rioux-Leclercq (2000) | 1.65             | 1.45-1.87     | <0.001         | fixed        | 0                                         | 0.507          |
| Yuba (2001)           | 1.67             | 1.47-1.89     | <0.001         | fixed        | 12.2                                      | 0.331          |
| Cheville (2002)       | 1.69             | 1.49-1.92     | <0.001         | fixed        | 2.6                                       | 0.416          |
| Bui (2004)            | 1.66             | 1.46-1.89     | <0.001         | fixed        | 11.9                                      | 0.333          |
| Kim (2004)            | 1.69             | 1.49-1.93     | <0.001         | fixed        | 5.7                                       | 0.389          |
| Kim (2005)            | 1.80             | 1.53-2.11     | <0.001         | fixed        | 0                                         | 0.509          |
| Tollefson (2007)      | 1.66             | 1.45-1.91     | <0.001         | fixed        | 12.3                                      | 0.330          |
| Parker (2009)         | 1.62             | 1.41-1.86     | <0.001         | fixed        | 1.7                                       | 0.423          |
| Zubac (2009)          | 1.65             | 1.45-1.87     | <0.001         | fixed        | 1.5                                       | 0.425          |
| Weber (2013)          | 1.65             | 1.46-1.87     | <0.001         | fixed        | 0                                         | 0.559          |
| Gayed (2014)          | 1.66             | 1.46-1.88     | <0.001         | fixed        | 5.2                                       | 0.393          |
| Combined              | 1.67             | 1.47-1.89     | <0.001         | fixed        | 2.7                                       | 0.417          |

HR: hazard ratio; CI: confidence interval; CSS: cancer-specific survival.

**Supplemental table 3. Pooled HR (95% CI) of sensitivity analysis for the effect of Ki-67 expression on DFS**

| <b>Study Omitted</b> | <b>Pooled HR</b> | <b>95% CI</b> | <b>P Value</b> | <b>Model</b> | <b>Heterogeneity <math>I^2</math> (%)</b> | <b>P Value</b> |
|----------------------|------------------|---------------|----------------|--------------|-------------------------------------------|----------------|
| Lehmann (2004)       | 2.36             | 1.62-3.43     | <0.001         | fixed        | 0                                         | 0.884          |
| Dudderidge (2005)    | 2.78             | 1.77-4.37     | <0.001         | fixed        | 0                                         | 0.505          |
| Kankuri (2006)       | 2.73             | 1.84-4.06     | <0.001         | fixed        | 0                                         | 0.539          |
| Gayed (2014)         | 2.43             | 1.65-3.57     | <0.001         | fixed        | 0                                         | 0.549          |
| Teng (2014)          | 2.56             | 1.73-3.79     | <0.001         | fixed        | 0                                         | 0.452          |
| Zheng (2014)         | 2.63             | 1.79-3.85     | <0.001         | fixed        | 0                                         | 0.473          |
| Combined             | 2.56             | 1.79-3.68     | <0.001         | fixed        | 0                                         | 0.598          |

HR: hazard ratio; CI: confidence interval; DFS: disease-free survival.
